# Supplementary material
Source: PubMed Central journal article supplement (PMC6145827)
Supplement: NIHMS982676-supplement-Supp.pdf [file NIHMS982676-supplement-Supp.pdf]

Supplement of Atmos. Chem. Phys., 16, 11915–11935, 2016  
<http://www.atmos-chem-phys.net/16/11915/2016/>  
doi:10.5194/acp-16-11915-2016-supplement  
© Author(s) 2016. CC Attribution 3.0 License.

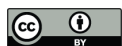

Atmospheric  
Chemistry  
and Physics  
Open Access  
EGU

*Supplement of*

## **Atmospheric mercury concentrations observed at ground-based monitoring sites globally distributed in the framework of the GMOS network**

**Francesca Sprovieri et al.**

*Correspondence to:* Francesca Sprovieri (f.sprovieri@iia.cnr.it)

The copyright of individual parts of the supplement might differ from the CC-BY 3.0 licence.

**Table S1.** Monthly means in ( $ng\ m^{-3}$ ) generated from the available monthly data points for 2013 and 2014 at each GMOS site. Number of available monthly data points are reported in Table S3.

| Code                | Jan         |             | Feb         |             | Mar         |             | Apr         |             | May         |             | Jun         |             | Jul         |             | Aug         |             | Sep         |             | Oct         |             | Nov         |             | Dec         |             |      |
|---------------------|-------------|-------------|-------------|-------------|-------------|-------------|-------------|-------------|-------------|-------------|-------------|-------------|-------------|-------------|-------------|-------------|-------------|-------------|-------------|-------------|-------------|-------------|-------------|-------------|------|
|                     | 2013        | 2014        | 2013        | 2014        | 2013        | 2014        | 2013        | 2014        | 2013        | 2014        | 2013        | 2014        | 2013        | 2014        | 2013        | 2014        | 2013        | 2014        | 2013        | 2014        | 2013        | 2014        | 2013        | 2014        |      |
| Northern Hemisphere | VRS         | 1.50        | 1.45        | 1.45        | 1.47        | 1.55        | 1.42        | 1.13        | 1.36        | 1.64        | 1.90        | 1.48        | 1.99        | 1.48        | 1.48        | 1.85        | -           | 1.52        | 1.40        | 1.40        | 1.41        | -           | 1.38        | 1.11        |      |
|                     | PAL         | -           | 1.59        | -           | 1.69        | 1.65        | -           | 1.60        | 1.51        | 1.36        | 1.48        | 1.39        | 1.48        | 1.39        | 1.36        | 1.44        | 1.39        | 1.33        | 1.36        | 1.36        | 1.47        | 1.37        | 1.52        | 1.46        |      |
|                     | RAO         | 1.46        | -           | 1.50        | 1.77        | 1.37        | 1.65        | 1.34        | 1.34        | 1.30        | 1.45        | 1.34        | 1.30        | 1.30        | 1.30        | 1.44        | 1.45        | -           | 1.46        | 1.46        | -           | 1.49        | -           | 1.51        |      |
|                     | MHD         | -           | 1.47        | 1.62        | 1.50        | 1.62        | 1.44        | 1.50        | 1.40        | 1.47        | 1.38        | 1.48        | 1.40        | -           | 1.32        | 1.43        | 1.45        | 1.39        | 1.23        | 1.27        | 1.34        | 1.31        | 1.42        | 1.46        | 1.51 |
|                     | LIS         | 1.56        | 1.45        | 1.59        | 1.50        | 1.51        | 1.53        | 1.43        | 1.41        | 1.33        | 1.35        | 1.18        | 1.32        | 1.18        | 1.32        | 1.25        | 1.34        | 1.13        | 1.24        | 1.26        | 1.29        | 1.40        | 1.38        | 1.56        |      |
|                     | CMA         | -           | -           | -           | -           | 1.67        | 1.60        | 1.60        | 1.60        | 1.57        | 1.57        | -           | 1.58        | -           | 1.38        | 1.74        | 1.74        | 1.92        | 1.92        | 1.88        | 1.88        | 1.79        | -           | 1.88        | 1.88 |
|                     | MCH         | 2.03        | 1.70        | 1.70        | 1.73        | 1.91        | 1.82        | 1.72        | 1.68        | 1.77        | 1.62        | -           | 1.37        | 1.37        | 1.36        | 1.91        | 1.51        | 1.51        | 1.30        | 1.74        | 1.57        | 1.92        | 1.62        | 1.78        | 1.54 |
|                     | LON         | -           | -           | 1.57        | -           | 1.74        | -           | 1.74        | -           | 1.51        | -           | -           | 1.44        | -           | 1.44        | 1.27        | -           | 1.22        | -           | 1.26        | -           | -           | -           | -           | -    |
|                     | MWA         | 1.08        | 1.08        | 1.55        | 1.13        | 1.49        | 1.06        | 1.73        | 1.14        | 1.50        | 0.91        | 1.26        | -           | 1.25        | -           | -           | 2.07        | -           | 1.61        | 1.36        | 1.75        | 1.08        | 1.60        | 1.13        | 1.33 |
|                     | MIN         | 1.92        | 1.98        | 2.01        | 1.88        | 2.00        | 1.97        | 2.04        | 1.94        | 2.25        | 2.10        | 1.63        | 1.99        | 1.56        | 1.81        | 1.58        | 1.73        | 1.58        | 1.84        | 1.85        | 1.75        | 1.86        | -           | 1.82        | 1.97 |
|                     | EVK         | 1.12        | 1.21        | 1.05        | 1.23        | 1.13        | 1.31        | 1.17        | 1.43        | 1.17        | 1.47        | 1.11        | 1.47        | 1.01        | 1.31        | -           | 1.31        | -           | 1.16        | -           | -           | -           | -           | -           | -    |
|                     | CHE         | 1.87        | 1.78        | 1.85        | 1.79        | 1.92        | 1.93        | 1.94        | 1.91        | 1.80        | 2.08        | 1.66        | 1.99        | 1.43        | 1.74        | 1.50        | 1.48        | 1.60        | 1.57        | 1.57        | 1.60        | 1.86        | 1.57        | 1.86        | 1.74 |
| MAL                 | 1.99        | 1.50        | -           | 1.39        | -           | 1.30        | 2.41        | 1.60        | 2.11        | 1.45        | 2.07        | 1.49        | 1.64        | -           | 2.02        | 1.48        | 2.28        | -           | 2.44        | 1.41        | 1.55        | 1.00        | 1.90        | 1.23        |      |
| Means               | <b>1.62</b> | <b>1.52</b> | <b>1.59</b> | <b>1.55</b> | <b>1.63</b> | <b>1.57</b> | <b>1.68</b> | <b>1.51</b> | <b>1.59</b> | <b>1.53</b> | <b>1.52</b> | <b>1.55</b> | <b>1.43</b> | <b>1.44</b> | <b>1.58</b> | <b>1.56</b> | <b>1.51</b> | <b>1.47</b> | <b>1.55</b> | <b>1.54</b> | <b>1.53</b> | <b>1.47</b> | <b>1.58</b> | <b>1.53</b> |      |
| Tropics             | SIS         | 1.47        | 1.04        | 1.27        | 0.96        | 1.25        | 0.96        | 1.26        | 1.20        | 1.25        | 1.23        | 1.17        | 1.14        | 1.06        | 1.10        | 1.17        | 1.12        | 1.12        | 1.00        | -           | 1.21        | -           | 1.29        | -           |      |
|                     | CAL         | 1.15        | 1.29        | 1.18        | 1.23        | 1.19        | 1.22        | 1.16        | 1.21        | 1.24        | -           | 1.26        | 1.12        | 1.25        | 1.16        | 1.29        | 1.17        | 1.17        | 1.12        | 1.12        | 1.20        | 1.17        | 1.38        | 1.33        |      |
|                     | KOD         | 1.61        | -           | 1.57        | -           | 1.62        | 1.50        | 1.65        | 1.69        | 1.62        | -           | 1.37        | 1.39        | 1.32        | 1.44        | 1.37        | 1.35        | 1.39        | 1.44        | 1.58        | -           | 1.75        | -           | 1.89        |      |
|                     | NIK         | -           | -           | 1.57        | -           | 1.32        | -           | 1.03        | -           | 1.01        | -           | 0.96        | -           | 1.09        | -           | -           | -           | 1.13        | 1.51        | 1.03        | 1.29        | 1.06        | 1.24        | 1.17        |      |
|                     | MAN         | -           | -           | 1.07        | 0.98        | 1.13        | 1.02        | -           | 1.10        | -           | 0.99        | -           | 0.96        | -           | 0.94        | 1.12        | 0.95        | -           | 1.18        | 1.18        | 1.01        | -           | -           | 1.05        |      |
| Means               | <b>1.41</b> | <b>1.17</b> | <b>1.33</b> | <b>1.06</b> | <b>1.30</b> | <b>1.17</b> | <b>1.27</b> | <b>1.30</b> | <b>1.28</b> | <b>1.28</b> | <b>1.15</b> | <b>1.15</b> | <b>1.22</b> | <b>1.12</b> | <b>1.12</b> | <b>1.17</b> | <b>1.19</b> | <b>1.29</b> | <b>1.08</b> | <b>1.35</b> | <b>1.12</b> | <b>1.39</b> | <b>1.26</b> | <b>1.36</b> |      |
| Southern Hemisphere | AMS         | 1.03        | 1.03        | 0.98        | 1.04        | 0.98        | 1.07        | 0.98        | 1.06        | 0.89        | 1.08        | 1.07        | 1.12        | 1.08        | 1.12        | 1.07        | 1.05        | 1.04        | 1.00        | 1.00        | 0.99        | 0.99        | 1.10        | 1.03        |      |
|                     | CPT         | 1.04        | 1.06        | -           | 1.14        | 1.08        | 1.04        | 1.02        | 1.04        | 1.02        | 0.96        | 1.00        | 0.91        | 0.97        | 1.09        | 0.95        | 1.25        | 1.09        | 1.08        | 1.12        | 1.19        | 0.99        | 1.13        | 0.97        |      |
|                     | BAR         | 0.91        | 0.85        | 0.90        | 0.74        | 0.82        | 0.79        | 0.79        | 0.89        | 0.93        | 0.92        | 0.94        | 0.89        | 0.94        | 0.95        | 0.96        | 0.95        | 0.90        | 0.92        | 0.84        | 0.92        | 0.94        | -           | 0.81        |      |
|                     | DDU         | 0.88        | 0.91        | 0.81        | 0.42        | 0.81        | -           | 0.96        | 0.97        | 0.88        | 0.68        | 0.83        | -           | 0.80        | 0.82        | 0.73        | -           | 0.68        | -           | -           | -           | -           | 0.67        | 0.98        |      |
|                     | DMC         | 0.69        | -           | 0.68        | -           | 1.16        | -           | 1.16        | -           | 1.01        | -           | 0.93        | -           | 0.89        | -           | 0.75        | -           | 0.85        | -           | 0.75        | -           | 0.66        | -           | 0.84        | -    |
| Means               | <b>0.91</b> | <b>0.96</b> | <b>0.84</b> | <b>0.84</b> | <b>0.97</b> | <b>0.97</b> | <b>0.99</b> | <b>0.99</b> | <b>0.93</b> | <b>0.92</b> | <b>0.96</b> | <b>0.96</b> | <b>0.94</b> | <b>0.98</b> | <b>0.90</b> | <b>1.09</b> | <b>0.92</b> | <b>1.02</b> | <b>0.93</b> | <b>1.04</b> | <b>0.90</b> | <b>0.93</b> | <b>0.94</b> | <b>1.07</b> |      |

**Table S2.** Means, Standard Deviations (St. Dev), percentiles 5<sup>th</sup>, 25<sup>th</sup>, 50<sup>th</sup> (median), 75<sup>th</sup> and 95<sup>th</sup> generated from the available annual data points for 2013 and 2014 at each GMOS site.

| Annually- based statistics |                |         |       |       |      |         |      |                 |      |                  |      |                  |      |                  |      |                  |      |      |
|----------------------------|----------------|---------|-------|-------|------|---------|------|-----------------|------|------------------|------|------------------|------|------------------|------|------------------|------|------|
| Code                       | Resolution (s) | n       |       | Mean  |      | St. Dev |      | 5 <sup>th</sup> |      | 25 <sup>th</sup> |      | 50 <sup>th</sup> |      | 75 <sup>th</sup> |      | 95 <sup>th</sup> |      |      |
|                            |                | 2013    | 2014  | 2013  | 2014 | 2013    | 2014 | 2013            | 2014 | 2013             | 2014 | 2013             | 2014 | 2013             | 2014 | 2013             | 2014 |      |
| Northern Hemisphere        | VRS            | 300     | 72361 | 35373 | 1.61 | 1.41    | 0.41 | 0.35            | 1.01 | 0.95             | 1.39 | 1.15             | 1.52 | 1.41             | 1.83 | 1.59             | 2.33 | 2.01 |
|                            | PAL            | 300     | 72361 | 35373 | 1.45 | 1.47    | 0.11 | 0.17            | 1.27 | 1.23             | 1.38 | 1.36             | 1.46 | 1.46             | 1.53 | 1.60             | 1.61 | 1.73 |
|                            | RAO            | 300     | 72361 | 35373 | 1.43 | 1.48    | 0.16 | 0.23            | 1.19 | 1.18             | 1.34 | 1.32             | 1.42 | 1.46             | 1.49 | 1.61             | 1.65 | 1.93 |
|                            | MHD            | 900/300 | 72361 | 35373 | 1.46 | 1.41    | 0.17 | 0.14            | 1.19 | 1.17             | 1.35 | 1.34             | 1.47 | 1.41             | 1.56 | 1.49             | 1.70 | 1.61 |
|                            | LIS            | 300     | 72361 | 35373 | 1.34 | 1.39    | 0.38 | 0.40            | 0.79 | 0.84             | 1.11 | 1.14             | 1.30 | 1.34             | 1.56 | 1.59             | 1.98 | 2.11 |
|                            | CM             | 300     | 72361 | 35373 | -    | 1.69    | 0.36 | 0.29            | 1.40 | 1.30             | 1.59 | 1.50             | 1.88 | 1.66             | 2.11 | 1.85             | 2.54 | 2.19 |
|                            | MCH            | 300     | 72361 | 35373 | 1.78 | 1.57    | 0.48 | 0.42            | 1.22 | 1.06             | 1.49 | 1.33             | 1.66 | 1.48             | 1.98 | 1.73             | 2.74 | 2.41 |
|                            | LON            | 300     | 72361 | 35373 | 1.43 | -       | 0.33 | -               | 0.98 | -                | 1.24 | -                | 1.43 | -                | 1.57 | -                | 2.00 | -    |
|                            | MWA            | 300     | 72361 | 35373 | 1.33 | 1.31    | 0.64 | 0.60            | 0.63 | 0.68             | 0.90 | 0.87             | 1.33 | 1.18             | 1.59 | 1.53             | 2.65 | 2.47 |
|                            | MIN            | 3600    | 72361 | 35373 | 1.86 | 1.91    | 0.40 | 0.40            | 1.34 | 1.45             | 1.60 | 1.65             | 1.79 | 1.82             | 2.04 | 2.06             | 2.61 | 2.65 |
|                            | EVK            | 300     | 72361 | 35373 | 1.11 | 1.33    | 0.42 | 0.22            | 0.78 | 0.98             | 0.95 | 1.18             | 1.11 | 1.32             | 1.23 | 1.46             | 1.50 | 1.70 |
|                            | CHE            | 300     | 72361 | 35373 | 1.74 | 1.78    | 0.38 | 0.35            | 1.30 | 1.40             | 1.50 | 1.50             | 1.60 | 1.70             | 1.90 | 1.90             | 2.40 | 2.50 |
| MAL                        | 300            | 72361   | 35373 | 2.04  | 1.33 | 0.64    | 0.40 | 1.32            | 0.83 | 1.60             | 1.06 | 2.04             | 1.26 | 2.33             | 1.49 | 3.26             | 2.10 |      |
| Tropics                    | SIS            | 300     | 72361 | 35373 | 1.20 | 1.11    | 0.24 | 0.37            | 0.80 | 0.82             | 1.06 | 0.95             | 1.20 | 1.08             | 1.33 | 1.21             | 1.58 | 1.45 |
|                            | CAL            | 300     | 72361 | 35373 | 1.22 | 1.20    | 0.14 | 0.09            | 1.04 | 1.08             | 1.15 | 1.14             | 1.22 | 1.19             | 1.27 | 1.25             | 1.46 | 1.36 |
|                            | KOD            | 300     | 72361 | 35373 | 1.54 | 1.54    | 0.20 | 0.26            | 1.25 | 1.20             | 1.40 | 1.35             | 1.54 | 1.48             | 1.68 | 1.71             | 1.87 | 2.03 |
|                            | NIK            | 60/300  | 72361 | 35373 | 1.13 | 1.28    | 0.42 | 0.46            | 0.43 | 0.75             | 0.81 | 1.08             | 1.12 | 1.29             | 1.43 | 1.47             | 1.78 | 1.74 |
|                            | MAN            | 600/300 | 72361 | 35373 | 1.08 | 0.99    | 0.23 | 0.23            | 0.77 | 0.69             | 0.95 | 0.85             | 1.09 | 0.96             | 1.20 | 1.11             | 1.52 | 1.43 |
| Southern Hemisphere        | AMS            | 300     | 72361 | 35373 | 1.03 | 1.05    | 0.09 | 0.05            | 0.87 | 0.95             | 0.98 | 1.02             | 1.03 | 1.05             | 1.09 | 1.08             | 1.17 | 1.12 |
|                            | CPT            | 3600    | 72361 | 35373 | 1.03 | 1.09    | 0.11 | 0.12            | 0.83 | 0.89             | 0.97 | 1.01             | 1.03 | 1.09             | 1.10 | 1.18             | 1.18 | 1.27 |
|                            | BAR            | 1800    | 72361 | 35373 | 0.89 | 0.87    | 0.15 | 0.15            | 0.60 | 0.60             | 0.82 | 0.77             | 0.89 | 0.88             | 1.00 | 0.99             | 1.09 | 1.07 |
|                            | DDU            | 3600    | 72361 | 35373 | 0.85 | 0.86    | 0.19 | 0.38            | 0.57 | 0.31             | 0.75 | 0.57             | 0.85 | 0.82             | 0.93 | 1.09             | 1.15 | 1.54 |
|                            | DMC            | 3600    | 72361 | 35373 | 0.84 | -       | 0.27 | -               | 0.32 | -                | 0.70 | -                | 0.87 | -                | 0.98 | -                | 1.28 | -    |

**Table S3.** Monthly - based number of available data points.

| Code                |     | Resolution (s) | Jan  |      | Feb  |      | Mar  |      | Apr  |      | May  |      | Jun  |      |
|---------------------|-----|----------------|------|------|------|------|------|------|------|------|------|------|------|------|
|                     |     |                | 2013 | 2014 | 2013 | 2014 | 2013 | 2014 | 2013 | 2014 | 2013 | 2014 | 2013 | 2014 |
| Northern Hemisphere | VRS | 300            | 8434 | 6432 | 4599 | 6711 | -    | 1955 | 6578 | 1363 | 7212 | 6089 | 7576 | 5008 |
|                     | PAL | 300            | -    | 8773 | -    | 7966 | -    | 8834 | -    | 8091 | 8827 | 8366 | 7554 | 8560 |
|                     | RAO | 300            | 6416 | -    | 5918 | 5856 | 5689 | 6266 | 2056 | 4396 | 1221 | 6298 | -    | 5688 |
|                     | MHD | 900/300        | -    | 2774 | 2044 | 2561 | 2835 | 2847 | 2749 | 1147 | 772  | 2735 | 1015 | 2591 |
|                     | LIS | 300            | 8949 | 7872 | 8024 | 7039 | 5083 | 7421 | 8651 | 6508 | 8895 | 8262 | 5697 | 8032 |
|                     | CMA | 300            | -    | -    | -    | -    | -    | 5832 | -    | 8126 | -    | 7313 | -    | 4216 |
|                     | MCH | 300            | 3131 | 4408 | 3402 | 3961 | 4009 | 4384 | 6201 | 4252 | 5997 | 4400 | -    | -    |
|                     | LON | 300            | -    | -    | 1454 | -    | 2389 | -    | 4752 | -    | 4392 | -    | 5060 | -    |
|                     | MWA | 300            | 2481 | 2490 | 2669 | 1155 | 4055 | 4107 | 3034 | 3816 | 1508 | 3908 | 787  | -    |
|                     | MIN | 3600           | 711  | 713  | 655  | 644  | 734  | 713  | 706  | 690  | 726  | 669  | 702  | 691  |
|                     | EVK | 900            | 1078 | 2023 | 1944 | 2645 | 1681 | 2885 | 2183 | 2751 | 1366 | 2409 | 855  | 1994 |
|                     | CHE | 3600           | 378  | 477  | 431  | 431  | 378  | 476  | 436  | 416  | 393  | 478  | 461  | 464  |
| MAL                 | 300 | 1200           | 2407 | -    | 2472 | -    | 3884 | 1869 | 3283 | 4798 | 2166 | 6866 | 2793 |      |
| Tropics             | SIS | 300            | 1525 | 6568 | 7723 | 4964 | 7922 | 6508 | 7749 | 6141 | 4275 | 7511 | 7247 | 7882 |
|                     | CAL | 300            | 3947 | 8552 | 6317 | 7984 | 8818 | 8731 | 1498 | 4415 | 3327 | -    | 8479 | 1283 |
|                     | KOD | 300            | 8511 | -    | 6092 | -    | 8601 | 5418 | 6772 | 8405 | 6939 | 8174 | -    | 8327 |
|                     | NIK | 60/300         | -    | -    | 4289 | -    | 9051 | -    | 8470 | -    | 8868 | -    | 7704 | -    |
|                     | MAN | 600/300        | -    | -    | 3242 | 3058 | 708  | 2936 | -    | 3917 | -    | 5107 | -    | 4962 |
| Southern Hemisphere | AMS | 3600           | 474  | 448  | 417  | 372  | 457  | 461  | 385  | 446  | 437  | 504  | 414  | 405  |
|                     | CPT | 1800           | 1025 | 1289 | -    | 949  | 1348 | 1362 | 1361 | 1312 | 1458 | 1459 | 1277 | 1407 |
|                     | BAR | 300            | 7275 | 6238 | 4727 | 6208 | 6216 | 6044 | 8545 | 5232 | 8486 | 5048 | 6718 | 4843 |
|                     | DDU | 3600           | 644  | 585  | 450  | 26   | 215  | -    | 635  | 50   | 725  | 84   | 661  | -    |
|                     | DMC | 3600           | 762  | -    | 585  | -    | 487  | -    | 271  | -    | 464  | -    | 297  | -    |

| Code                |     | Resolution (s) | Jul  |      | Aug  |      | Sep  |      | Oct  |      | Nov   |      | Dec  |      |
|---------------------|-----|----------------|------|------|------|------|------|------|------|------|-------|------|------|------|
|                     |     |                | 2013 | 2014 | 2013 | 2014 | 2013 | 2014 | 2013 | 2014 | 2013  | 2014 | 2013 | 2014 |
| Northern Hemisphere | VRS | 300            | 7493 | 301  | 6203 | -    | 4889 | -    | 5891 | -    | 7030  | -    | 6456 | 7514 |
|                     | PAL | 300            | 8056 | 7747 | 8397 | 8566 | 8476 | 7318 | 7221 | 7768 | 8539  | 4388 | 8053 | 4287 |
|                     | RAO | 300            | -    | 6063 | -    | -    | -    | -    | -    | 3407 | -     | 6250 | -    | 5437 |
|                     | MHD | 900/300        | -    | 2265 | 313  | 2852 | 2474 | 2668 | 2601 | 2823 | 2065  | 2763 | 2855 | 2444 |
|                     | LIS | 300            | 8632 | 8353 | 8947 | 7842 | 7837 | 7648 | 6835 | 7628 | 8275  | 6295 | 8236 | 5035 |
|                     | CMA | 300            | 1128 | 3900 | -    | 2538 | -    | 4120 | -    | 5035 | -     | 2095 | 2347 | 6914 |
|                     | MCH | 300            | 2143 | 2166 | 1152 | 5260 | 1358 | 7772 | 3664 | 7650 | 4520  | 6982 | 4286 | 8662 |
|                     | LON | 300            | 3323 | -    | 5657 | -    | 5567 | -    | 3382 | -    | -     | -    | -    | -    |
|                     | MWA | 300            | 4908 | -    | -    | 1487 | -    | 2926 | 1237 | 3471 | 2350  | 1125 | 5232 | 3863 |
|                     | MIN | 3600           | 508  | 691  | 715  | 713  | 469  | 691  | 488  | 544  | 690   | -    | 712  | 545  |
|                     | EVK | 900            | 1457 | 2249 | -    | 2882 | -    | 1136 | -    | -    | -     | -    | -    | -    |
|                     | CHE | 3600           | 448  | 387  | 477  | 314  | 461  | 463  | 341  | 363  | 470   | 463  | 477  | 468  |
| MAL                 | 300 | 7023           | -    | 7191 | -    | 5881 | -    | 8358 | 3594 | 4237 | 6192  | 5173 | 3893 |      |
| Tropics             | SIS | 300            | 4026 | 8240 | 6856 | 7341 | 7254 | 2831 | 6547 | -    | 6370  | -    | 6939 | -    |
|                     | CAL | 300            | 8462 | 8807 | 4888 | 8815 | 6127 | 8428 | 8105 | 2356 | 7291  | 5560 | 8825 | 3958 |
|                     | KOD | 300            | 8553 | 8523 | 8319 | 8476 | 3894 | 8408 | -    | 8207 | -     | 5891 | -    | 7476 |
|                     | NIK | 60/300         | 5544 | -    | -    | -    | 1053 | 4795 | 2873 | 8322 | 10221 | 8682 | 1892 | 8130 |
|                     | MAN | 600/300        | -    | 4103 | 2189 | 2211 | -    | -    | 2600 | -    | 2588  | -    | -    | 1161 |
| Southern Hemisphere | AMS | 3600           | 551  | 543  | 534  | 265  | 508  | 492  | 515  | 508  | 516   | 488  | 390  | 556  |
|                     | CPT | 1800           | 1457 | 1394 | 1176 | 1376 | 1220 | 1344 | 1362 | 1422 | 854   | 1385 | 114  | 1378 |
|                     | BAR | 300            | 4598 | 1068 | 5971 | 4548 | 5724 | 4809 | 4070 | 151  | 5943  | -    | 3048 | -    |
|                     | DDU | 3600           | 639  | 17   | 655  | -    | 82   | -    | -    | -    | -     | 569  | 415  | 626  |
|                     | DMC | 3600           | 554  | -    | 591  | -    | 616  | -    | 245  | -    | 431   | -    | 213  | 240  |

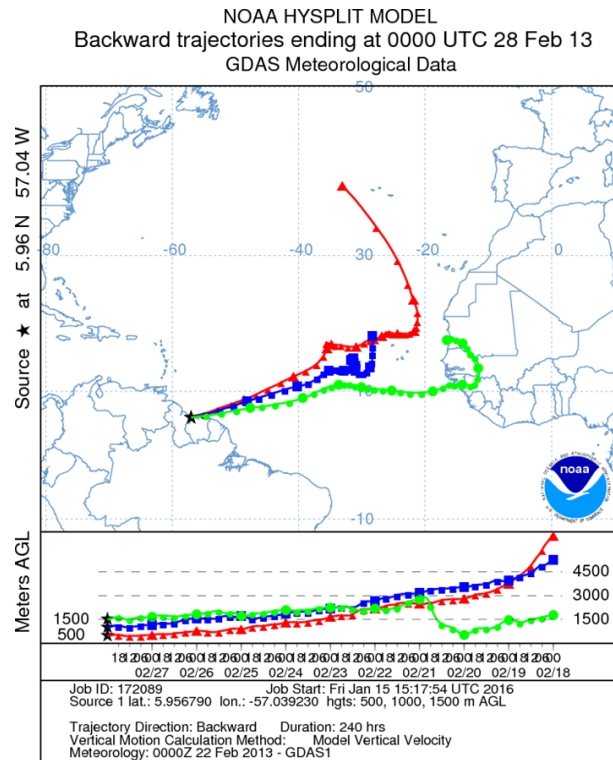

**Figure S1.** The 28 Feb 2013 case analysis for NIK: 10-day HYSPLIT backward trajectories using the Hybrid single-particle Lagrangian integrated trajectory model (HYSPLIT) available at the NOAA Air Resources Laboratory (Air Resources Laboratory 2010).

NOAA HYSPLIT MODEL  
 Backward trajectories ending at 1600 UTC 07 Sep 14  
 GDAS Meteorological Data

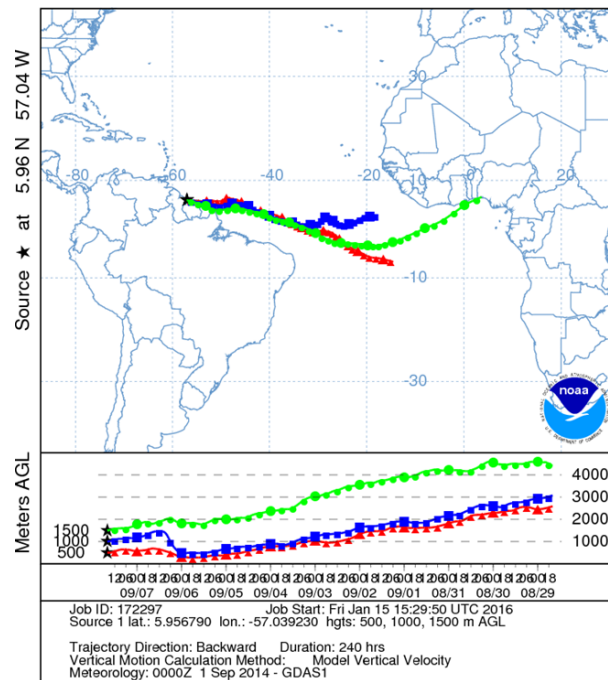

**Figure S2.** The 7 Sep 2014 case analysis for NIK: 10-day HYSPLIT backward trajectories using the Hybrid single-particle Lagrangian integrated trajectory model (HYSPLIT) available at the NOAA Air Resources Laboratory (Air Resources Laboratory 2010).
